# Supplementary material for: Differences in plasma lipoprotein profiles between patients with chronic peripheral neuropathic pain and healthy controls: an exploratory pilot study
Source: PubMed Central journal article supplement (PMC9529241; doi:10.1097/pr9.0000000000001036), 2022-09-22
Supplement: painreports-7-e1036-s001.pdf [file painreports-7-e1036-s001.pdf]

## Supplement:

### Clinical pain parameters in respect to lipoprotein fractions – clinical case study

From **Table 1**, three groups for sensory examination findings were selected: one depicting hypersensitivity and two illustrating hyposensitivity. Group A represented hypersensitivity and consisted of 2 patients that reported hyperaesthesia, hyperalgesia, and dysaesthesia. Group B and C represented cases of hyposensitivity; group B consisted of 4 patients reporting hypoaesthesia and group C consisted of 6 patients reporting hypoaesthesia and hypoalgesia. The concentration of each significant lipoprotein fraction identified by OPLS-DA, **Table 3**, was compared between the groups and presented as scatter plots. Nine graphs were selected, showing highest difference between the groups of hyposensitivity and hypersensitivity (**Supplemental Figure 1**). Generally, group A showed higher concentration of the 9 lipoprotein fractions compared to group B and C, however much larger groups are required to validate this seeming trend.

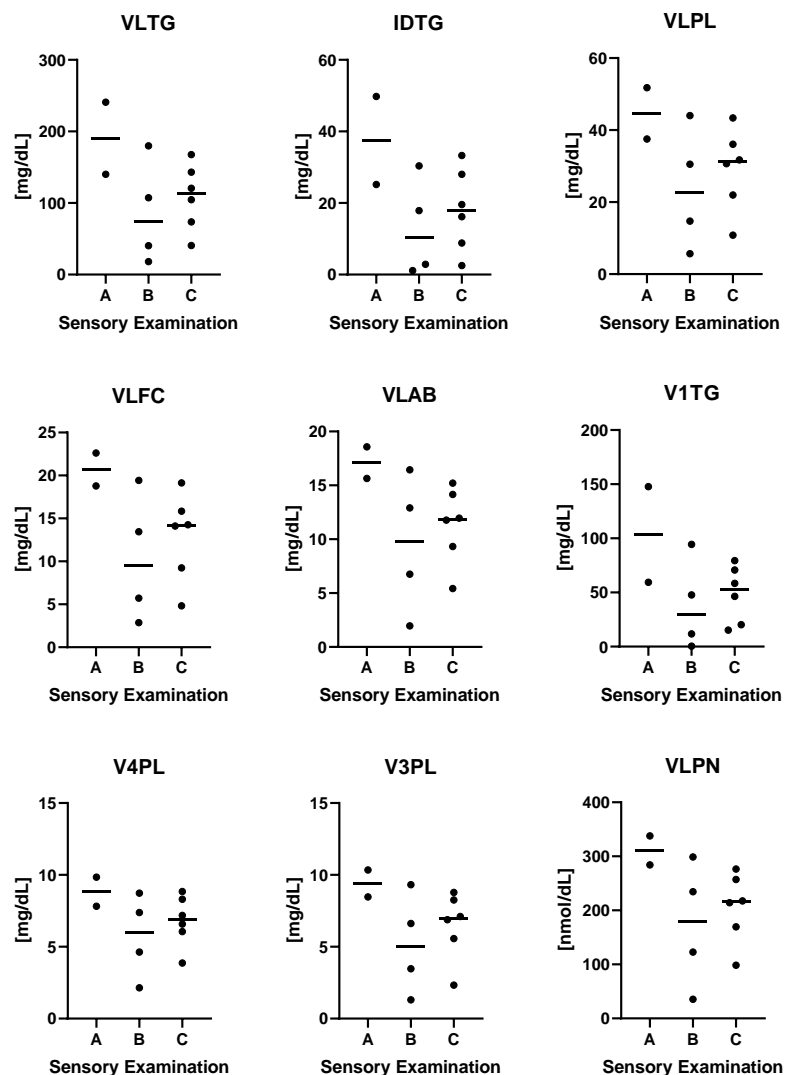

**Supplemental Figure 1:** Clinical case-study: pain parameters in respect to lipoprotein fractions. Scatter plot of lipoprotein fractions associated with sensory examination. Each dot represents a patient and median values are shown by a horizontal line. Sensory examination groups:

A – hyperaesthesia, hyperalgesia, and dysaesthesia.

B – hypoaesthesia.

C – hypoaesthesia, and hypoalgesia.

Effects of age on lipoprotein profiles

The observed vs predicted relationship between lipoprotein fractions and age is shown in **Supplemental Figure 2** for healthy controls and in **Supplemental Figure 3** for NeuP patients.

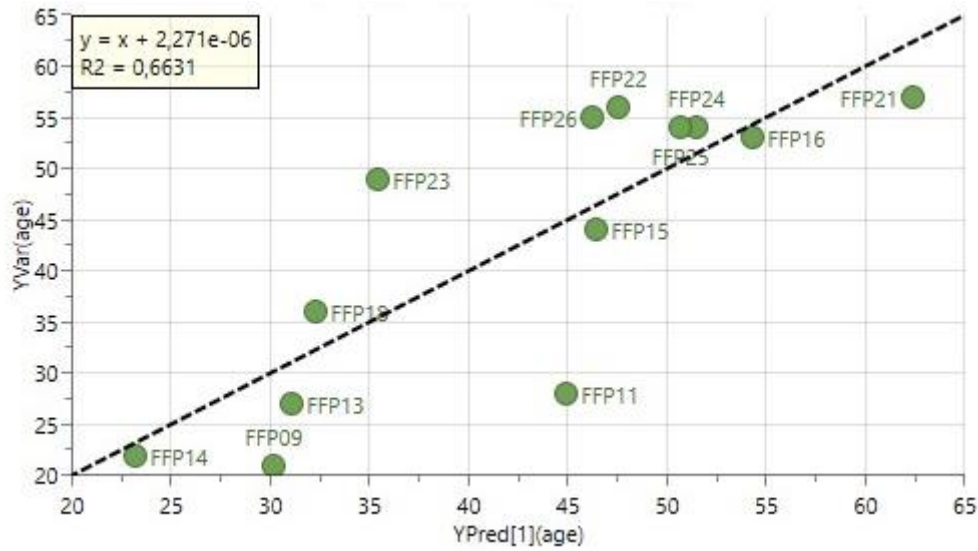

**Supplemental Figure 2:** Effects of age on lipoprotein profiles among healthy controls; observed vs predicted relationship to age, CV-ANOVA=0.018

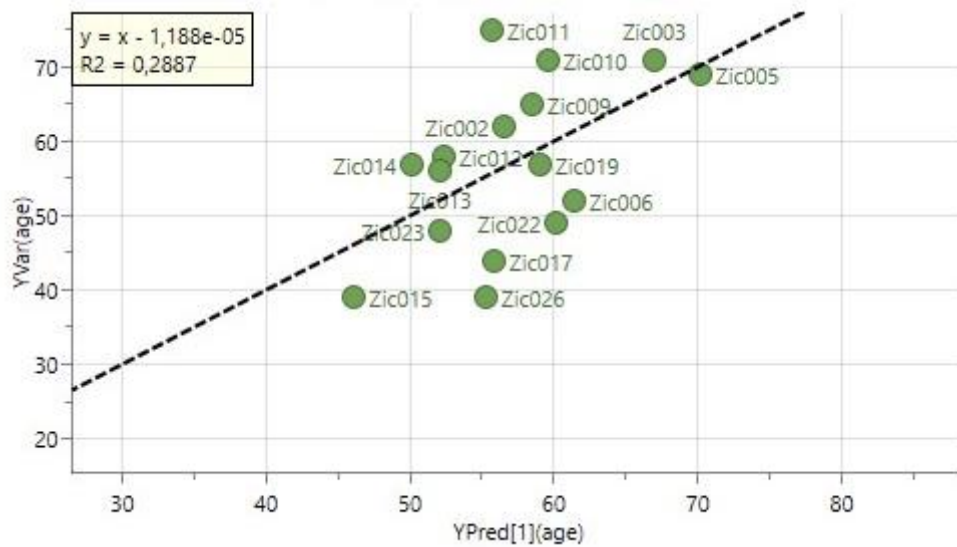

**Supplemental Figure 3:** Effects of age on lipoprotein profiles among patients with chronic peripheral NeuP; observed vs predicted relationship to age, CV-ANOVA=1.

Supplement Table 1: Principal Lipoprotein fractions

| <i>Abbreviation</i> | <i>Description</i>               | <i>Density (kg/L)</i> |
|---------------------|----------------------------------|-----------------------|
| <i>VLDL</i>         | Very low-density lipoprotein     | 0.950 - 1.006         |
| <i>LDL</i>          | Low density lipoprotein          | 1.006 - 1.019         |
| <i>IDL</i>          | Intermediate density lipoprotein | 1.019 - 1.063         |
| <i>HDL</i>          | High density lipoprotein         | 1.063 - 1.210         |

Subfractions of Principal Lipoprotein fractions (numbering indicating increasing density):

VLDL – 5 subfractions (VLDL-1, VLDL-2, VLDL-3, VLDL-4, VLDL-5)

LDL – 6 subfractions (LDL-1, LDL-2, LDL-3, LDL-4, LDL-5, LDL-6)

HDL – 4 subfractions (HDL-1, HDL-2, HDL-3, HDL-4)

Abbreviation of Apolipoproteins:

Apo-B = Apolipoprotein B100

Apo-A = Apolipoprotein A

Supplement Table 2: All lipoprotein fractions and subfractions measured

| <i>Abbreviation</i> | <i>Description</i>                             | <i>Subfraction</i> |
|---------------------|------------------------------------------------|--------------------|
| <i>TPTG</i>         | Total particle triglycerides                   |                    |
| <i>TPCH</i>         | Total particle cholesterol                     |                    |
| <i>LDCH</i>         | LDL-cholesterol                                |                    |
| <i>HDCH</i>         | HDL-cholesterol                                |                    |
| <i>TPA1</i>         | Total particle Apo-A1                          |                    |
| <i>TPA2</i>         | Total particle Apo-A2                          |                    |
| <i>TPAB</i>         | Total particle Apo-B                           |                    |
| <i>LDHD</i>         | LDL-cholesterol / HDL-cholesterol              |                    |
| <i>ABAI</i>         | Apo-B / Apo-A1                                 |                    |
| <i>TBPN</i>         | Total Concentration of ApoB carrying Particles |                    |
| <i>VLPN</i>         | VLDL- particle number                          |                    |
| <i>IDPN</i>         | IDL-particle number                            |                    |
| <i>LDPN</i>         | LDL-particle number                            |                    |
| <i>L1PN</i>         | LDL1-particle number                           | 1                  |
| <i>L2PN</i>         | LDL2-particle number                           | 2                  |
| <i>L3PN</i>         | LDL3-particle number                           | 3                  |
| <i>L4PN</i>         | LDL4-particle number                           | 4                  |
| <i>L5PN</i>         | LDL5-particle number                           | 5                  |
| <i>L6PN</i>         | LDL6-particle number                           | 6                  |
| <i>VLTG</i>         | VLDL-triglycerides                             |                    |
| <i>IDTG</i>         | IDL-triglycerides                              |                    |

|             |                         |   |
|-------------|-------------------------|---|
| <i>LDTG</i> | LDL-triglycerides       |   |
| <i>HDTG</i> | HDL-triglycerides       |   |
| <i>VLCH</i> | VLDL-Cholesterol        |   |
| <i>IDCH</i> | IDL-Cholesterol         |   |
| <i>VLFC</i> | VLDL-Free Cholesterol   |   |
| <i>IDFC</i> | IDL-Free Cholesterol    |   |
| <i>LDFC</i> | LDL-Free Cholesterol    |   |
| <i>HDFC</i> | HDL-Free Cholesterol    |   |
| <i>VLPL</i> | VLDL-Phospholipids      |   |
| <i>IDPL</i> | IDL-Phospholipids       |   |
| <i>LDPL</i> | LDL-Phospholipids       |   |
| <i>HDPL</i> | HDL-Phospholipids       |   |
| <i>HDA1</i> | HDL-Apo-A1              |   |
| <i>HDA2</i> | HDL-Apo-A2              |   |
| <i>VLAB</i> | VLDL-Apo-B              |   |
| <i>IDAB</i> | IDL-Apo-B               |   |
| <i>LDAB</i> | LDL-Apo-B               |   |
| <i>VITG</i> | VLDL1-Triglycerides     | 1 |
| <i>V2TG</i> | VLDL2-Triglycerides     | 2 |
| <i>V3TG</i> | VLDL3-Triglycerides     | 3 |
| <i>V4TG</i> | VLDL4-Triglycerides     | 4 |
| <i>V5TG</i> | VLDL5-Triglycerides     | 5 |
| <i>V1CH</i> | VLDL1-Cholesterol       | 1 |
| <i>V2CH</i> | VLDL2-Cholesterol       | 2 |
| <i>V3CH</i> | VLDL2-Cholesterol       | 3 |
| <i>V4CH</i> | VLDL2-Cholesterol       | 4 |
| <i>V5CH</i> | VLDL2-Cholesterol       | 5 |
| <i>V1FC</i> | VLDL1- Free Cholesterol | 1 |
| <i>V2FC</i> | VLDL2- Free Cholesterol | 2 |
| <i>V3FC</i> | VLDL3- Free Cholesterol | 3 |
| <i>V4FC</i> | VLDL4- Free Cholesterol | 4 |
| <i>V5FC</i> | VLDL5- Free Cholesterol | 5 |
| <i>V1PL</i> | VLDL1-Phospholipids     | 1 |
| <i>V2PL</i> | VLDL2-Phospholipids     | 2 |
| <i>V3PL</i> | VLDL3-Phospholipids     | 3 |
| <i>V4PL</i> | VLDL4-Phospholipids     | 4 |
| <i>V5PL</i> | VLDL5-Phospholipids     | 5 |
| <i>L1TG</i> | LDL1-Triglycerides      | 1 |
| <i>L2TG</i> | LDL2-Triglycerides      | 2 |
| <i>L3TG</i> | LDL3-Triglycerides      | 3 |
| <i>L4TG</i> | LDL4-Triglycerides      | 4 |
| <i>L5TG</i> | LDL5-Triglycerides      | 5 |
| <i>L6TG</i> | LDL6-Triglycerides      | 6 |
| <i>L1CH</i> | LDL1-Cholesterol        | 1 |
| <i>L2CH</i> | LDL2-Cholesterol        | 2 |
| <i>L3CH</i> | LDL3-Cholesterol        | 3 |

|             |                       |   |
|-------------|-----------------------|---|
| <i>L4CH</i> | LDL4-Cholesterol      | 4 |
| <i>L5CH</i> | LDL5-Cholesterol      | 5 |
| <i>L6CH</i> | LDL6-Cholesterol      | 6 |
| <i>L1FC</i> | LDL1-Free Cholesterol | 1 |
| <i>L2FC</i> | LDL2-Free Cholesterol | 2 |
| <i>L3FC</i> | LDL3-Free Cholesterol | 3 |
| <i>L4FC</i> | LDL4-Free Cholesterol | 4 |
| <i>L5FC</i> | LDL5-Free Cholesterol | 5 |
| <i>L6FC</i> | LDL6-Free Cholesterol | 6 |
| <i>L1PL</i> | LDL1-Phospholipids    | 1 |
| <i>L2PL</i> | LDL2-Phospholipids    | 2 |
| <i>L3PL</i> | LDL3-Phospholipids    | 3 |
| <i>L4PL</i> | LDL4-Phospholipids    | 4 |
| <i>L5PL</i> | LDL5-Phospholipids    | 5 |
| <i>L6PL</i> | LDL6-Phospholipids    | 6 |
| <i>L1AB</i> | LDL1-ApoB             | 1 |
| <i>L2AB</i> | LDL2-ApoB             | 2 |
| <i>L3AB</i> | LDL3-ApoB             | 3 |
| <i>L4AB</i> | LDL4-ApoB             | 4 |
| <i>L5AB</i> | LDL5-ApoB             | 5 |
| <i>L6AB</i> | LDL6-ApoB             | 6 |
| <i>H1TG</i> | HDL1-Triglycerides    | 1 |
| <i>H2TG</i> | HDL2-Triglycerides    | 2 |
| <i>H3TG</i> | HDL3-Triglycerides    | 3 |
| <i>H4TG</i> | HDL4-Triglycerides    | 4 |
| <i>H1CH</i> | HDL1-Cholesterol      | 1 |
| <i>H2CH</i> | HDL2-Cholesterol      | 2 |
| <i>H3CH</i> | HDL3-Cholesterol      | 3 |
| <i>H4CH</i> | HDL4-Cholesterol      | 4 |
| <i>H1FC</i> | HDL1-Free Cholesterol | 1 |
| <i>H2FC</i> | HDL2-Free Cholesterol | 2 |
| <i>H3FC</i> | HDL3-Free Cholesterol | 3 |
| <i>H4FC</i> | HDL4-Free Cholesterol | 4 |
| <i>H1PL</i> | HDL1-Phospholipids    | 1 |
| <i>H2PL</i> | HDL2-Phospholipids    | 2 |
| <i>H3PL</i> | HDL3-Phospholipids    | 3 |
| <i>H4PL</i> | HDL4-Phospholipids    | 4 |
| <i>H1A1</i> | HDL1-Apo-A1           | 1 |
| <i>H2A1</i> | HDL2-Apo-A1           | 2 |
| <i>H3A1</i> | HDL3-Apo-A1           | 3 |
| <i>H4A1</i> | HDL4-Apo-A1           | 4 |
| <i>H1A2</i> | HDL1-Apo-A2           | 1 |
| <i>H2A2</i> | HDL2-Apo-A2           | 2 |
| <i>H3A2</i> | HDL3-Apo-A2           | 3 |
| <i>H4A2</i> | HDL4-Apo-A2           | 4 |

---
